# Supplementary material
Source: Elsevier journal article supplement (https://www.sciencedirect.com/science/article/pii/S2659663621000278)
Supplement: mmc1 [file S2659663621000278:mmc1.pdf]

## Anexo 1. Cuestionario COAS <sup>GEMPAC</sup>.

Por favor, indique para cada una de las preguntas si considera que es cierta o falsa

|                                                                                             | Cierto                   | Falso                    |
|---------------------------------------------------------------------------------------------|--------------------------|--------------------------|
| 1. El asma es una enfermedad que dura toda la vida pero que se puede controlar.             | <input type="checkbox"/> | <input type="checkbox"/> |
| 2. Un enfermo asmático puede estar mucho tiempo sin síntomas.                               | <input type="checkbox"/> | <input type="checkbox"/> |
| 3. El asma es una enfermedad infecciosa.                                                    | <input type="checkbox"/> | <input type="checkbox"/> |
| 4. El asma es una enfermedad inflamatoria de los bronquios.                                 | <input type="checkbox"/> | <input type="checkbox"/> |
| 5. El tratamiento prescrito por el médico se debe cumplir siempre.                          | <input type="checkbox"/> | <input type="checkbox"/> |
| 6. El asma tiene un tratamiento de mantenimiento, principalmente con cortisona inhalada.    | <input type="checkbox"/> | <input type="checkbox"/> |
| 7. El tratamiento de mantenimiento no se modifica nunca.                                    | <input type="checkbox"/> | <input type="checkbox"/> |
| 8. El asma tiene un tratamiento “de rescate”, principalmente con broncodilatadores.         | <input type="checkbox"/> | <input type="checkbox"/> |
| 9. La tos, el cansancio o la opresión en el pecho pueden indicar un empeoramiento del asma. | <input type="checkbox"/> | <input type="checkbox"/> |
| 10. La necesidad de aumentar la frecuencia de la medicación indica mal control del asma.    | <input type="checkbox"/> | <input type="checkbox"/> |
| 11. La manera como se administra la medicación inhalada es importante para que sea eficaz.  | <input type="checkbox"/> | <input type="checkbox"/> |
| 12. Es recomendable enjuagarse la boca después del tratamiento inhalado.                    | <input type="checkbox"/> | <input type="checkbox"/> |
| 13. El consumo de tabaco no empeora el asma.                                                | <input type="checkbox"/> | <input type="checkbox"/> |
| 14. Deben realizarse controles periódicos del asma con su médico.                           | <input type="checkbox"/> | <input type="checkbox"/> |
| 15. Las rampas pueden indicar un empeoramiento del asma.                                    | <input type="checkbox"/> | <input type="checkbox"/> |
| 16. El polvo, el humo o el aire frío pueden empeorar el asma.                               | <input type="checkbox"/> | <input type="checkbox"/> |
| 17. Algunos estímulos: luz o ruidos intensos pueden empeorar el asma.                       | <input type="checkbox"/> | <input type="checkbox"/> |
| 18. El ejercicio físico o el estrés pueden empeorar el asma.                                | <input type="checkbox"/> | <input type="checkbox"/> |
| 19. Estar muchas horas sentado puede desencadenar una crisis asmática.                      | <input type="checkbox"/> | <input type="checkbox"/> |
| 20. Sufrir asma implica tener alergia.                                                      | <input type="checkbox"/> | <input type="checkbox"/> |

**PUNTUACIÓN TOTAL** \_\_\_\_\_

**Conocimiento fisiopatológico: 1, 2, 3 y 4.**

**Cuidados de salud: 5, 6, 7, 8, 9, 10, 11, 12, 14, 15 y 19.**

**Factores ambientales: 13,16, 17, 18 y 20**
